# Supplementary material
Source: Springer Nature journal article supplement (https://www.springermedizin.de/resource/supplementary/13054_2013_2461_MOESM1_ESM.pdf/9714076)
Supplement: MOESM1 [file 9714076]

583 consecutive hospital admissions for bedside RRT

229 end-stage renal disease on chronic dialysis, 55 failed to meet RIFLE criteria

299 patients with AKI were included

112 failed to meet sepsis criteria

187 patients with septic AKI were included

22 failed to meet CVVHF or EDHF criteria  
7 died or stop RRT within 72 h  
13 inability to obtain complete record

145 patients for CVVHF and EDHF treatment

65 were included in CVVHF group

80 were included in EDHF group
